# Supplementary material
Source: Springer Nature journal article supplement (https://www.springermedizin.de/resource/supplementary/13000_2013_925_MOESM1_ESM.pdf/9625734)

■ European

■ Arabic/Moroccan

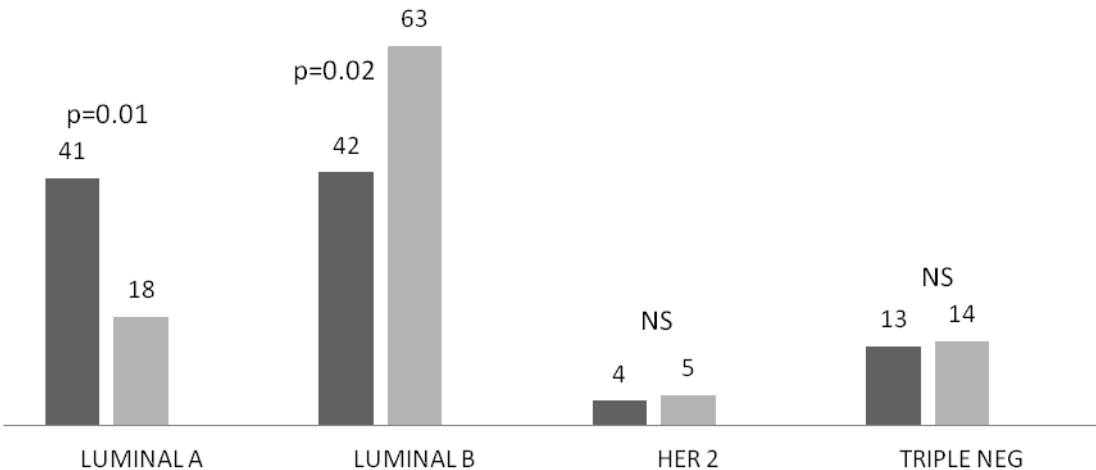

Supplement: MOESM1 [file 9625734]
